# Supplementary material for: Heart Transplantation in Children With Down Syndrome
Source: PubMed Central journal article supplement — J Am Heart Assoc. 2022 May 16;11(10):e024883. doi: 10.1161/JAHA.121.024883 (PMC9238550; doi:10.1161/jaha.121.024883), 2022-05-16

# **SUPPLEMENTAL MATERIAL**

# Demographics

---

Record ID

---

Center

- Ann & Robert H. Lurie Children's Hospital of Chicago
- Arkansas Children's Hospital
- Children's Hospital of Philadelphia
- Children's Hospital of Pittsburgh of UPMC
- Cincinnati Children's Hospital Medical Center
- Columbia University - Morgan Stanley Children's Hospital of New York Presbyterian
- Freeman Hospital, Newcastle upon Tyne
- Le Bonheur Children's Hospital
- Lucile Packard Children's Hospital at Stanford
- Monroe Carell Jr. Children's Hospital at Vanderbilt
- Primary Children's Hospital
- St. Louis Children's Hospital
- Texas Children's Hospital
- University of Alberta
- University of Minnesota Masonic Children's Hospital
- Other

---

Transplant center

---

---

Patient Date of Birth

---

---

Gender

- Male
- Female

---

Blood type

- O
- A
- B
- AB

---

Race

- Caucasian
- African American
- Asian
- Hispanic
- Other

---

Congenital heart disease?

- Yes
- No

---

Details of congenital heart defect

---

# Listing

---

Indication for transplantation?

---

---

Date of initial transplant listing

---

---

Listed for multi-organ transplant?

- Yes  
 No

---

In addition to the heart, what other organs was the patient listed for?

- Liver  
 Lung  
 Kidney  
 Other

---

What other organ was the patient listed for?

---

---

Weight at listing

---

(kg)

---

Height at listing

---

(cm)

---

Initial Listing Status

- 1A  
 1B  
 2

---

Initial Listing Status

---

---

Location at the time of listing

- In ICU  
 Hospitalized, not in ICU  
 Outpatient

---

Support at the time of listing (Check all that apply)

- Ventilator  
 ECMO  
 Inotropes  
 VAD  
 Inhaled nitric oxide  
 Other  
 None of the above

---

Other support details

---

---

VAD type

---

---

Biventricular support?

- Yes  
 No

---

Functional status at the time of listing?

- Performs most age-appropriate activities independently  
 Performs age-appropriate activities with some assistance  
 Required assistance for all activities  
 n/a patient < 1 year of age

---

**Events preceding transplant listing**

---

Prior cardiac surgery?

- Yes  
 No

---

Number of prior cardiac surgeries

\_\_\_\_\_

---

Most recent preceding cardiac surgery date

\_\_\_\_\_

---

Prior malignancy

- Yes  
 No

---

Malignancy type

\_\_\_\_\_

---

Date of malignancy diagnosis

\_\_\_\_\_

---

Catheterization performed pre-transplant?

- Yes  
 No

---

Date of most recent catheterization preceding listing

\_\_\_\_\_

---

Hemodynamics: PVR

\_\_\_\_\_ (wU)

---

Hemodynamics: Cardiac Index

\_\_\_\_\_ (mL/kg/m<sup>2</sup>)

---

Hemodynamics: Wedge pressure (mean)

\_\_\_\_\_ (mmHg)

---

Other events or other patient comorbidities preceding transplantation

\_\_\_\_\_

# Transplant

---

Waitlist outcome

- Underwent transplant
- Died or delisted due to clinical deterioration
- Delisted due to clinical improvement
- Other

---

Date of waitlist death

\_\_\_\_\_

---

Delisting date

\_\_\_\_\_

---

Other outcome

\_\_\_\_\_

---

Date of transplant

\_\_\_\_\_

---

Multi-organ transplant?

- Yes
- No

---

In addition to the heart, what other organs were transplanted? (Check all that apply)

- Liver
- Lung
- Kidney
- Other

---

What other organ was transplanted?

\_\_\_\_\_

---

Weight at transplant

\_\_\_\_\_  
(kg)

---

Height at transplant

\_\_\_\_\_  
(cm)

---

Donor weight

\_\_\_\_\_  
(kg)

---

Donor height

\_\_\_\_\_  
(cm)

---

Support at the time of transplantation (Check all that apply)

- Ventilator
- ECMO
- Inotropes
- VAD
- Inhaled nitric oxide
- Other
- None of the above

---

Donor ischemic time

\_\_\_\_\_

(min)

---

Required ECMO post-transplant

- Yes
- No

---

Required dialysis post-transplant?

- Yes
- No

---

Survived to hospital discharge?

- Yes
- No

---

Date of initial hospital discharge (post-transplant)

\_\_\_\_\_

---

Induction immunosuppression used (check all that apply)

- Steroids
- Thymoglobulin
- Basiliximab
- IVIG
- Other

---

Other induction immunosuppression detail

\_\_\_\_\_

---

Maintenance immunosuppression at the time of discharge (check all that apply)

- Steroids
- Tacrolimus
- Mycophenolate
- Azathioprine
- Cyclosporine
- Sirolimus
- Everolimus
- Other

---

Other maintenance immunosuppression detail

\_\_\_\_\_

---

Did you alter your standard immunosuppression strategy due to the presence of Down syndrome?

- Yes
- No

---

How was immunosuppression altered for this patient compared to your standard practice?

\_\_\_\_\_

---

Treated infection prior to hospital discharge

- Yes
- No

---

Details of infection prior to hospital discharge

---

# Follow-up

Date of last known follow-up

\_\_\_\_\_

Last known patient status

- Alive
- Deceased
- Retransplanted

Retransplant date

\_\_\_\_\_

Indication for retransplantation

\_\_\_\_\_

Cause of death

\_\_\_\_\_

Has the patient been transitioned to an adult practice?

- Yes
- No

Last known functional status

- Performs most age-appropriate activities independently
- Performs age-appropriate activities with some assistance
- Required assistance for all activities
- n/a patient < 1 year of age

## Rejection Events

Has the patient had any episodes of treated rejection?

- Yes
- No

How many episodes of treated rejection has the patient had?

- 1
- 2
- 3
- 4 or more

Date of rejection episode #1

\_\_\_\_\_

Hemodynamic compromise with rejection episode #1?

- Yes
- No

Type of rejection event #1

- Cellular
- Antibody mediated
- Mixed
- No biopsy performed / empiric therapy



---

Date of rejection episode #2

---

Hemodynamic compromise with rejection episode #2?

- Yes  
 No

---

Type of rejection event #2

- Cellular  
 Antibody mediated  
 Mixed  
 No biopsy performed / empiric therapy

---

Date of rejection episode #3

\_\_\_\_\_

---

Hemodynamic compromise with rejection episode #3?

- Yes  
 No

---

Type of rejection event #3

- Cellular  
 Antibody mediated  
 Mixed  
 No biopsy performed / empiric therapy

---

Date of rejection episode #4

\_\_\_\_\_

---

Hemodynamic compromise with rejection episode #4?

- Yes  
 No

---

Type of rejection event #4

- Cellular  
 Antibody mediated  
 Mixed  
 No biopsy performed / empiric therapy

---

### **Post-transplant malignancy**

---

Has the patient had malignancy post-transplant?

- Yes  
 No

---

Date of post-transplant malignancy diagnosis

\_\_\_\_\_

---

Type of post-transplant malignancy?

\_\_\_\_\_

## Post-transplant infection

Hospitalized for infection in the first year post-transplant?

- Yes  
 No

Number of hospitalizations for infection in the first year post-transplant?

- 1  
 2  
 3  
 4 or more

Date of infection #1

\_\_\_\_\_

Type of infection: Episode #1

\_\_\_\_\_

Date of infection #2

\_\_\_\_\_

Type of infection: Episode #2

\_\_\_\_\_

Date of infection #3

\_\_\_\_\_

Type of infection: Episode #3

\_\_\_\_\_

Date of infection #4

\_\_\_\_\_

Type of infection: Episode #4

\_\_\_\_\_

**Figure S1. Number of patients with down syndrome listed for transplant by year.**  
Dashed line demonstrates the linear trend over time.

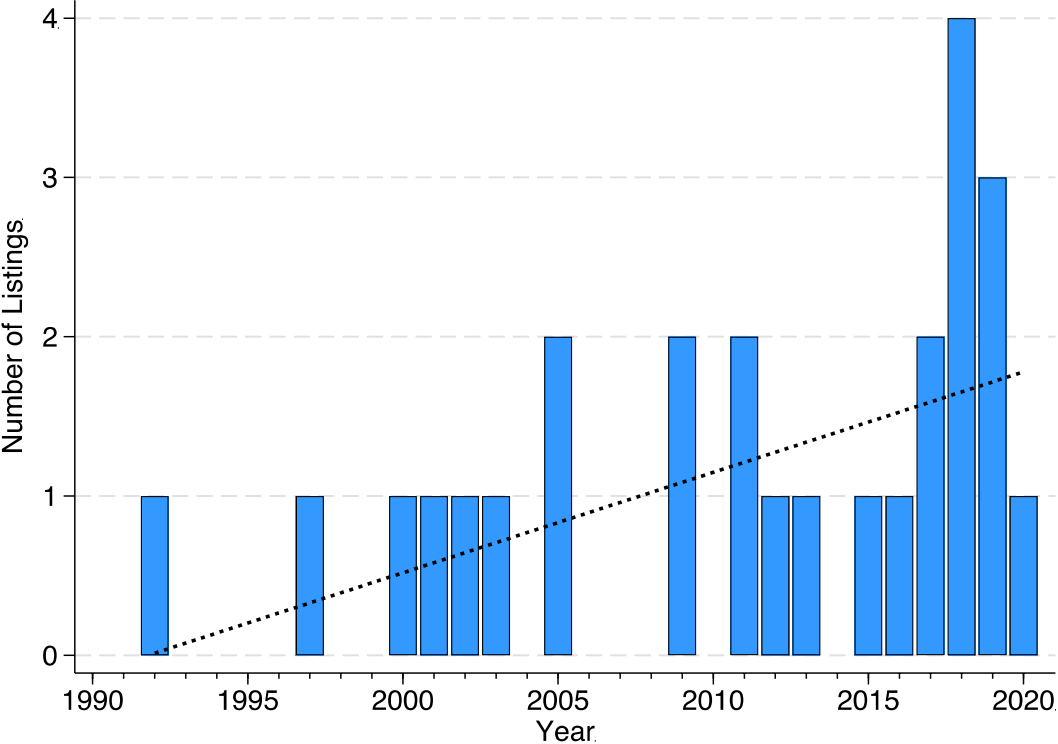

Figure S2. Age distribution of listed patients and associated indications for listing.

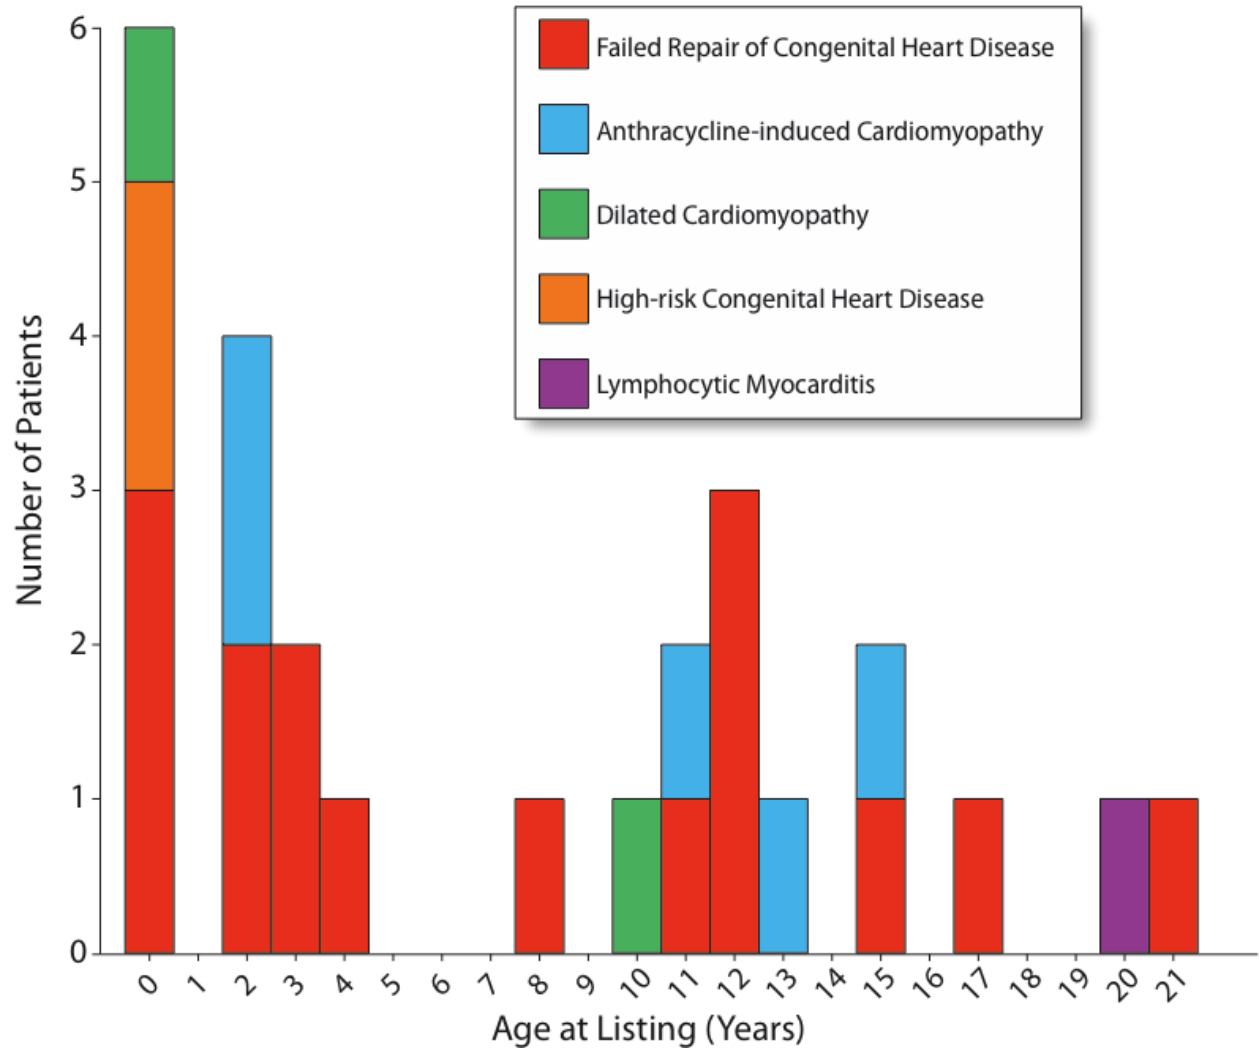

**Figure S3. Distribution of indexed pulmonary vascular resistance for patients who underwent a pre-transplant catheterization.**

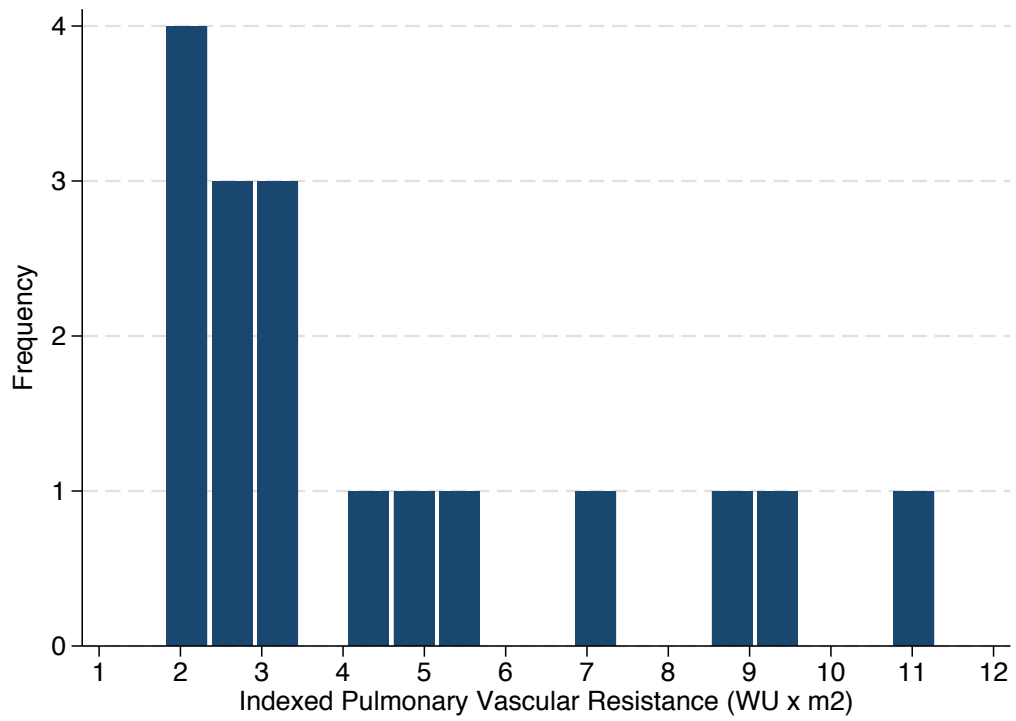

Supplement: JAH3-11-e024883-s001.pdf [file JAH3-11-e024883-s001.pdf]
